# Supplementary material for: DNA metabarcoding for high-throughput monitoring of estuarine macrobenthic communities
Source: PubMed Central journal article supplement (PMC5688171; doi:10.1038/s41598-017-15823-6), 2017-11-15
Supplement: 41598_2017_15823_MOESM1_ESM.pdf [file 41598_2017_15823_MOESM1_ESM.pdf]

## **Supplementary Information**

### **DNA metabarcoding for high-throughput monitoring of estuarine macrobenthic communities**

Jorge Lobo<sup>1,2,\*</sup>, Shadi Shokralla<sup>3</sup>, Maria Helena Costa<sup>2</sup>, Mehrdad Hajibabaei<sup>3</sup>, Filipe Oliveira Costa<sup>1</sup>

<sup>1</sup>CBMA – Centre of Molecular and Environmental Biology, University of Minho, Campus de Gualtar, 4710-057 Braga, Portugal

<sup>2</sup>MARE – Marine and Environmental Sciences Centre. New University of Lisbon. Campus de Caparica, 2829-516 Caparica, Portugal

<sup>3</sup>Centre for Biodiversity Genomics, Biodiversity Institute of Ontario and Department of Integrative Biology. University of Guelph. Guelph, ON N1G 2W1, Canada

\* Corresponding author. [j.loboarteaga@gmail.com](mailto:j.loboarteaga@gmail.com)

SI Figure

SI Tables

SI Figure

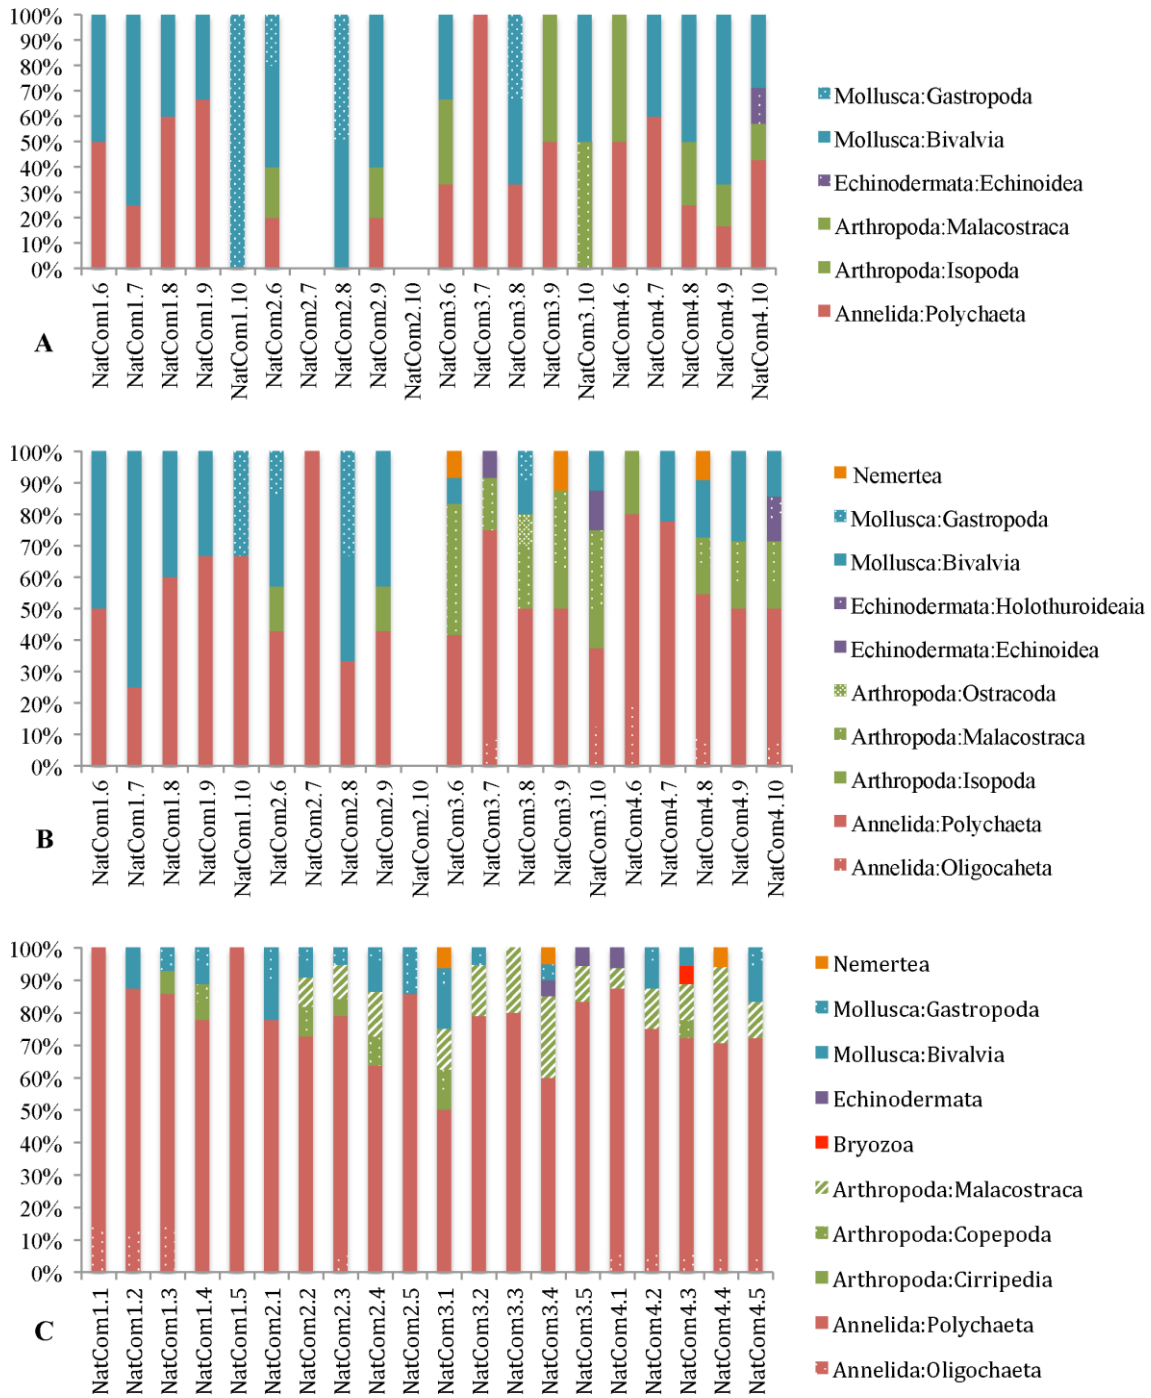

**Figure S1: Species composition of all samples of NMC.** A shows species composition considering only specimens morphologically identified to the species level. B considering specimens morphologically identified to a higher taxonomic level. C shows species composition recovered through HTS. No specimens were identified to the species level in NMC2.7. No specimens were collected in NMC2.10.

**Table S1: Number of reads assigned to species in each NMC and primer pair.**

|               | <b>Primer pair B</b>                         |                | <b>Primer pair D</b>                         |                |
|---------------|----------------------------------------------|----------------|----------------------------------------------|----------------|
|               | <b>Our reference library of DNA barcodes</b> | <b>GenBank</b> | <b>Our reference library of DNA barcodes</b> | <b>GenBank</b> |
| <b>NMC1.1</b> | 160483                                       | 159067         | 12599                                        | 63949          |
| <b>NMC1.2</b> | 20607                                        | 623            | 7980                                         | 1207           |
| <b>NMC1.3</b> | 7592                                         | 37             | 7621                                         | 200            |
| <b>NMC1.4</b> | 374041                                       | 370148         | 20986                                        | 38273          |
| <b>NMC1.5</b> | 68404                                        | 56324          | 3474                                         | 44838          |
| <b>NMC2.1</b> | 2478                                         | 2386           | 3737                                         | 4856           |
| <b>NMC2.2</b> | 9916                                         | 9606           | 1721                                         | 2459           |
| <b>NMC2.3</b> | 150                                          | 704            | 544                                          | 17586          |
| <b>NMC2.4</b> | 153016                                       | 165386         | 110936                                       | 152695         |
| <b>NMC2.5</b> | 56                                           | 56             | 32                                           | 28             |
| <b>NMC3.1</b> | 126991                                       | 191736         | 53429                                        | 13195          |
| <b>NMC3.2</b> | 153152                                       | 148388         | 20397                                        | 16061          |
| <b>NMC3.3</b> | 160258                                       | 216194         | 158693                                       | 214413         |
| <b>NMC3.4</b> | 178432                                       | 207279         | 50386                                        | 50080          |
| <b>NMC3.5</b> | 100297                                       | 99112          | 48646                                        | 48256          |
| <b>NMC4.1</b> | 96110                                        | 151869         | 86172                                        | 31648          |
| <b>NMC4.2</b> | 159175                                       | 51999          | 134581                                       | 38645          |
| <b>NMC4.3</b> | 152206                                       | 112758         | 90353                                        | 69141          |
| <b>NMC4.4</b> | 223908                                       | 215030         | 46798                                        | 33450          |
| <b>NMC4.5</b> | 7601                                         | 24570          | 616                                          | 702            |

**Table S2: Taxonomic classification of the species identified in each NMC through HTS (with the primer pairs B and D) and morphological identifications.** Numbers indicate the number of reads (HTS) and number of specimens for each species.

| Kingdom  | Phylum   | Class       | Order            | Family                                         | Species                                           | NMC1                                                        |                                                   |                     |                      |           |
|----------|----------|-------------|------------------|------------------------------------------------|---------------------------------------------------|-------------------------------------------------------------|---------------------------------------------------|---------------------|----------------------|-----------|
|          |          |             |                  |                                                |                                                   | HTS B                                                       | HTS D                                             | Morph.              |                      |           |
| Animalia | Annelida | Polychaeta  |                  | Capitellidae                                   | <i>Notomastus profundus</i> (Eisig, 1887)         | -                                                           | 0/553/0/0/0                                       | -                   |                      |           |
|          |          |             |                  | Maldanidae                                     | <i>Axiothella constricta</i> (Claparède, 1869)    | -                                                           | -                                                 | -                   |                      |           |
|          |          |             |                  |                                                | <i>Euclymene santandarensis</i> (Rioja, 1917)     | 3/0/0/0/0                                                   | -                                                 | -                   |                      |           |
|          |          |             |                  |                                                | <i>Euclymene sp.</i>                              | -                                                           | 4/0/0/3/0                                         | -                   |                      |           |
|          |          |             |                  |                                                | <i>Heteroclymene robusta</i> Arwidsson, 1906      | 18/0/3/41/0                                                 | 0/1058/0/0/0                                      | -                   |                      |           |
|          |          |             |                  |                                                | <i>Leiochone leiopygos</i> (Grube, 1860)          | 9/597/0/3/0                                                 | 0/0/4/0/6                                         | -                   |                      |           |
|          |          |             |                  |                                                | <i>Leiochone sp.</i>                              | -                                                           | 0/0/3/5/0                                         | -                   |                      |           |
|          |          |             |                  |                                                | <i>Praxillella praetermissa</i> (Malmgren, 1865)  | 0/0/22/23/0                                                 | 27/0/54/7/0                                       | -                   |                      |           |
|          |          |             |                  |                                                | Orbiniidae                                        | Orbiniidae ni                                               | -                                                 | -                   | -                    |           |
|          |          |             |                  |                                                | Eunicida                                          | Eunicidae                                                   | <i>Marphysa sanguinea</i> (Montagu, 1815)         | -                   | 4/0/0/0/8            | 0/1/0/2/0 |
|          |          |             |                  |                                                |                                                   | <i>Marphysa sp.</i>                                         | -                                                 | -                   | -                    |           |
|          |          |             |                  |                                                | Onuphidae                                         | <i>Diopatra aciculata</i> Knox & Cameron, 1971              | -                                                 | 0/0/0/3/0           | -                    |           |
|          |          |             |                  |                                                |                                                   | <i>Diopatra marocensis</i> Paxton, Fadlaoui & Lechapt, 1995 | -                                                 | -                   | -                    |           |
|          |          |             |                  |                                                |                                                   | <i>Diopatra neapolitana</i> Delle Chiaje, 1841              | 10/0/3/373857/30                                  | 0/0/0/38069/7       | -                    |           |
|          |          |             |                  |                                                | Phyllodocida                                      | Glyceridae                                                  | <i>Glycera alba</i> (O.F. Müller, 1776)           | 6/0/0/6/7           | 21/0/6/18/19         | 0/0/0/1/0 |
|          |          |             |                  |                                                |                                                   |                                                             | <i>Glycera sp.</i>                                | -                   | 14/0/6/0/0           | -         |
|          |          |             |                  |                                                |                                                   |                                                             | <i>Glycera tridactyla</i> Schmarda, 1861          | -                   | -                    | -         |
|          |          |             |                  |                                                |                                                   | Nephtyidae                                                  | <i>Nephtys cirrosa</i> Ehlers, 1868               | -                   | 12433/0/0/5/1342     | 0/0/1/0/0 |
|          |          |             |                  |                                                |                                                   |                                                             | <i>Nephtys hombergii</i> Savigny in Lamarck, 1818 | 160437/0/9/30/53510 | 63886/0/125/95/44291 | 1/0/0/0/0 |
|          |          |             |                  |                                                |                                                   | Nereididae                                                  | <i>Hediste diversicolor</i> (O.F. Müller, 1776)   | 0/24/0/0/0          | 0/104/0/0/0          | 0/0/1/0/0 |
|          |          |             |                  |                                                |                                                   | Phyllodocidae                                               | <i>Phyllodoce groenlandica</i> Örsted, 1842       | 0/0/0/0/3832        | 0/0/0/0/507          | -         |
|          |          |             |                  |                                                |                                                   | Polynoidae                                                  | <i>Paralepidonotus ampulliferus</i> (Grube, 1878) | -                   | 0/10/0/0/0           | -         |
|          |          |             |                  |                                                | Sabellida                                         | Oweniidae                                                   | <i>Owenia fusiformis</i> Delle Chiaje, 1844       | -                   | 0/0/0/3/0            | -         |
|          |          | Terebellida | Cirratulidae     | Cirratulidae ni                                | 6/0/0/6/14864                                     | 3/0/0/3/1874                                                | -                                                 |                     |                      |           |
|          |          |             | Pectinariidae    | <i>Lagis koreni</i> Malmgren, 1866             | -                                                 | -                                                           | 0/2/0/0/0                                         |                     |                      |           |
|          |          |             | Terebellidae     | <i>Pista cristata</i> (Müller, 1776)           | 0/0/3/7/0                                         | 0/0/11/15/0                                                 | -                                                 |                     |                      |           |
|          |          |             | Trichobranchinae | <i>Trichobranchus glacialis</i> Malmgren, 1866 | 0/19986/7552/0/0                                  | 0/6236/7543/10/0                                            | -                                                 |                     |                      |           |
|          |          | Clitellata  | Haplotaxida      | Tubificidae                                    | <i>Chaetogaster diaphanus</i> (Gruithuisen, 1828) | 0/4/0/0/0                                                   | 4/0/0/0/0                                         | -                   |                      |           |
|          |          |             |                  |                                                | <i>Nais communis</i> Piguët, 1906                 | -                                                           | 0/0/6/0/0                                         | -                   |                      |           |

|               |              |                   |                |                                                 |           |            |           |
|---------------|--------------|-------------------|----------------|-------------------------------------------------|-----------|------------|-----------|
|               |              |                   |                | <i>Stylaria lacustris</i> (Linnaeus, 1767)      | -         | 3/0/5/0/0  | -         |
|               |              | Lumbriculida      | Lumbriculidae  | <i>Lumbriculus variegatus</i> (Müller, 1774)    | -         | -          | -         |
| Arthropoda    | Cirripedia   | Sessilia          | Balanidae      | <i>Amphibalanus amphitrite</i> (Darwin, 1854)   | 0/0/4/0/0 | 0/0/0/16/0 | -         |
|               | Copepoda     | Calanoida         | Acartiidae     | <i>Paracartia grani</i> Sars G.O., 1904         | 0/0/0/3/0 | -          | -         |
|               |              |                   | Centropagidae  | <i>Centropages hamatus</i> (Lilljeborg, 1853)   | -         | -          | -         |
|               |              |                   | Temoridae      | <i>Temora longicornis</i> (Müller O.F., 1785)   | -         | -          | -         |
|               |              | Cyclopoida        |                | Cyclopoida ni                                   | -         | -          | -         |
|               |              | Poecilostomatoida | Mytilicolidae  | <i>Mytilicola orientalis</i> Mori, 1935         | -         | -          | -         |
|               | Malacostraca | Amphipoda         | Ampeliscidae   | <i>Ampelisca brevicornis</i> (Costa, 1853)      | -         | -          | -         |
|               |              |                   |                | <i>Ampelisca sp.</i>                            | -         | -          | -         |
|               |              |                   | Corophiidae    | <i>Corophium sp.</i>                            | -         | -          | -         |
|               |              | Isopoda           | Anthuridae     | <i>Cyathura carinata</i> (Krøyer, 1847)         | -         | -          | -         |
|               |              |                   | Sphaeromatidae | Sphaeromatidae ni                               | -         | -          | -         |
|               |              | Decapoda          | Callianassidae | <i>Pestarella tyrrhena</i> (Petagna, 1792)      | -         | -          | -         |
|               |              |                   | Diogenidae     | <i>Diogenes pugilator</i> (Roux, 1829)          | -         | -          | -         |
|               |              |                   | Inachidae      | <i>Macropodia rostrata</i> (Linnaeus, 1761)     | -         | -          | -         |
|               |              |                   |                | <i>Macropodia sp.</i>                           | -         | -          | -         |
|               |              |                   | Paguridae      | <i>Pylopaguropsis magnimanus</i>                | -         | -          | -         |
|               |              |                   | Pilumnidae     | <i>Pilumnus hirtellus</i> (Linnaeus, 1761)      | -         | -          | -         |
|               |              |                   |                | <i>Pilumnus spinifer</i> H. Milne Edwards, 1834 | -         | -          | -         |
|               |              |                   | Pinnotheridae  | <i>Pinnotheres pisum</i> (Linnaeus, 1767)       | -         | -          | -         |
|               |              |                   | Upogebiidae    | <i>Upogebia deltaura</i> (Leach, 1815)          | -         | -          | -         |
| Bryozoa       | Gymnolaemata | Cheilostomatida   | Bugulidae      | <i>Bugula neritina</i> (Linnaeus, 1758)         | -         | -          | -         |
| Echinodermata | Echinoidea   | Spatangoida       | Loveniidae     | <i>Echinocardium cordatum</i> (Pennant, 1777)   | -         | -          | -         |
| Mollusca      | Bivalvia     | Anomalodesmata    | Thraciidae     | <i>Thracia phaseolina</i> (Lamarck, 1818)       | -         | -          | -         |
|               |              | Myoida            | Corbulidae     | <i>Corbula gibba</i> (Olivi, 1792)              | -         | -          | 1/0/1/0/0 |
|               |              | Veneroida         | Cardiidae      | <i>Cerastoderma edule</i> (Linnaeus, 1758)      | -         | -          | 0/2/1/0/0 |
|               |              |                   |                | <i>Parvicardium exiguum</i> (Gmelin, 1791)      | -         | -          | -         |
|               |              |                   |                | <i>Parvicardium pinnulatum</i> (Conrad, 1831)   | -         | -          | -         |
|               |              |                   | Donacidae      | <i>Donax trunculus</i> Linnaeus, 1758           | -         | -          | -         |
|               |              |                   | Mactridae      | <i>Spisula solida</i> (Linnaeus, 1758)          | -         | -          | 0/1/0/0/0 |
|               |              |                   | Semelidae      | <i>Abra alba</i> (W. Wood, 1802)                | -         | -          | -         |
|               |              |                   | Ungulinidae    | <i>Diplodonta rotundata</i> (Montagu, 1803)     | -         | -          | -         |
|               |              |                   | Veneridae      | <i>Chamelea striatula</i> (da Costa, 1778)      | -         | -          | -         |

|           |            |                 |                 |                  |                                                                               |            |            |           |
|-----------|------------|-----------------|-----------------|------------------|-------------------------------------------------------------------------------|------------|------------|-----------|
|           |            |                 | [unassigned]    |                  |                                                                               |            |            |           |
|           |            |                 | Euheterodonta   | Solenidae        | <i>Solen marginatus</i> Pulteney, 1799                                        | -          | 0/35/0/6/0 | 0/1/0/1/0 |
|           |            | Gastropoda      | Littorinimorpha | Hydrobiidae      | <i>Ecrobia ventrosa</i> (Montagu, 1803)                                       | -          | -          | 0/0/0/0/1 |
|           |            |                 | Neogastropoda   | Nassariidae      | <i>Nassarius reticulatus</i> (Linnaeus, 1758)                                 | 0/0/0/76/0 | 0/0/0/51/0 | -         |
|           | Nemertea   | Anopla          |                 | Lineidae         | <i>Cerebratulus longiceps</i> Coe, 1901                                       | -          | -          | -         |
|           |            |                 |                 |                  | <i>Cerebratulus sp.</i>                                                       | -          | -          | -         |
| Plantae   | Rhodophyta | Bangiophyceae   | Bangiales       | Bangiaceae       | <i>Pyropia haitanensis</i> (T.J.Chang & B.F.Zheng) N.Kikuchi & M.Miyata, 2011 | -          | -          | -         |
|           |            | Florideophyceae | Ceramiales      | Ceramiaceae      | <i>Ceramium secundatum</i> Lyngbye, 1819                                      | -          | -          | -         |
| Chromista | Ochrophyta | Phaeophyceae    | Fucales         | Durvillaeaceae   | <i>Durvillaea sp.</i>                                                         | -          | -          | -         |
|           |            |                 | Ectocarpales    | Chordariaceae    | <i>Leathesia marina</i> (Lyngbye) Decaisne, 1842                              | -          | -          | -         |
|           |            |                 | Scytosiphonales | Scytosiphonaceae | <i>Petalonia fascia</i> (O.F.Müller) Kuntze, 1898                             | -          | -          | -         |
|           |            |                 |                 |                  | <i>Scytosiphon lomentaria</i> (Lyngbye) Link, 1833                            | -          | -          | -         |

|          |          |            |       |              |                                                  |                                                             | NMC2                                              |                     |                  |   |
|----------|----------|------------|-------|--------------|--------------------------------------------------|-------------------------------------------------------------|---------------------------------------------------|---------------------|------------------|---|
| Kingdom  | Phylum   | Class      | Order | Family       | Species                                          | HTS B                                                       | HTS D                                             | Morph.              |                  |   |
| Animalia | Annelida | Polychaeta |       | Capitellidae | <i>Notomastus profundus</i> (Eisig, 1887)        | -                                                           | 142/65/480/108                                    | -                   |                  |   |
|          |          |            |       | Maldanidae   | <i>Axiothella constricta</i> (Claparède, 1869)   | 0/4/0/0/0                                                   | -                                                 | -                   |                  |   |
|          |          |            |       |              | <i>Euclymene santandarensis</i> (Rioja, 1917)    | 0/33/10/0/0                                                 | 0/0/0/3/0                                         | -                   |                  |   |
|          |          |            |       |              | <i>Euclymene sp.</i>                             | 0/17/3/0/0                                                  | -                                                 | -                   |                  |   |
|          |          |            |       |              | <i>Heteroclymene robusta</i> Arwidsson, 1906     | 0/0/51/0/0                                                  | 0/0/4/4/0                                         | -                   |                  |   |
|          |          |            |       |              | <i>Leiochone leiopygos</i> (Grube, 1860)         | 0/37/32/3/3                                                 | 0/0/4/0/0                                         | -                   |                  |   |
|          |          |            |       |              | <i>Leiochone sp.</i>                             | 0/5/0/0/0                                                   | -                                                 | -                   |                  |   |
|          |          |            |       |              | <i>Praxillella praetermissa</i> (Malmgren, 1865) | 15/120/31/0/8                                               | 0/0/0/9/0                                         | -                   |                  |   |
|          |          |            |       |              | Orbiniidae                                       | Orbiniidae ni                                               | -                                                 | -                   | -                |   |
|          |          |            |       |              | Eunicida                                         | Eunicidae                                                   | <i>Marphysa sanguinea</i> (Montagu, 1815)         | 0/52/11/3/0         | -                | - |
|          |          |            |       |              |                                                  | <i>Marphysa sp.</i>                                         | -                                                 | -                   | -                |   |
|          |          |            |       |              | Onuphidae                                        | <i>Diopatra aciculata</i> Knox & Cameron, 1971              | -                                                 | -                   | -                |   |
|          |          |            |       |              |                                                  | <i>Diopatra marocensis</i> Paxton, Fadlaoui & Lechapt, 1995 | 0/20/0/0/0                                        | 0/0/3/0/0           | -                |   |
|          |          |            |       |              |                                                  | <i>Diopatra neapolitana</i> Delle Chiaje, 1841              | 371/34/3/99/0                                     | 14/0/5/48/0         | -                |   |
|          |          |            |       |              | Phyllodocida                                     | Glyceridae                                                  | <i>Glycera alba</i> (O.F. Müller, 1776)           | 7/121/12/42234/10   | 4/7/0/32465/14   | - |
|          |          |            |       |              |                                                  |                                                             | <i>Glycera sp.</i>                                | 6/123/13/43978/12   | 0/5/0/0/16       | - |
|          |          |            |       |              |                                                  |                                                             | <i>Glycera tridactyla</i> Schmarda, 1861          | -                   | 0/0/0/30/0       | - |
|          |          |            |       |              |                                                  | Nephtyidae                                                  | <i>Nephtys cirrosa</i> Ehlers, 1868               | -                   | 0/0/0/48/0       | - |
|          |          |            |       |              |                                                  |                                                             | <i>Nephtys hombergii</i> Savigny in Lamarck, 1818 | 2042/9313/5/1066/35 | 547/361/0/1196/6 | - |

|               |              |                   |                  |                                                   |               |               |           |
|---------------|--------------|-------------------|------------------|---------------------------------------------------|---------------|---------------|-----------|
|               |              |                   | Nereididae       | <i>Hediste diversicolor</i> (O.F. Müller, 1776)   | -             | -             | -         |
|               |              |                   | Phyllodoceidae   | <i>Phyllodoce groenlandica</i> Örsted, 1842       | -             | -             | -         |
|               |              |                   | Polynoidae       | <i>Paralepidonotus ampulliferus</i> (Grube, 1878) | -             | -             | -         |
|               |              | Sabellida         | Oweniidae        | <i>Owenia fusiformis</i> Delle Chiaje, 1844       | 0/3/0/11682/0 | 0/0/0/7085/0  | -         |
|               |              | Terebellida       | Cirratulidae     | Cirratulidae ni                                   | 0/27/0/0/0    | -             | -         |
|               |              |                   | Pectinariidae    | <i>Lagis koreni</i> Malmgren, 1866                | -             | -             | -         |
|               |              |                   | Terebellidae     | <i>Pista cristata</i> (Müller, 1776)              | 0/13/4/7/0    | 0/0/0/5/4     | 0/0/0/1/0 |
|               |              |                   | Trichobranchinae | <i>Trichobranchus glacialis</i> Malmgren, 1866    | 5/0/0/0/0     | 0/0/4/0/0     | 1/0/0/0/0 |
|               | Clitellata   | Haplotaxida       | Tubificidae      | <i>Chaetogaster diaphanus</i> (Gruithuisen, 1828) | -             | -             | -         |
|               |              |                   |                  | <i>Nais communis</i> Piguët, 1906                 | -             | 0/0/4/0/0     | -         |
|               |              |                   |                  | <i>Stylaria lacustris</i> (Linnaeus, 1767)        | -             | -             | -         |
|               |              | Lumbriculida      | Lumbriculidae    | <i>Lumbriculus variegatus</i> (Müller, 1774)      | -             | -             | -         |
| Arthropoda    | Cirripedia   | Sessilia          | Balanidae        | <i>Amphibalanus amphitrite</i> (Darwin, 1854)     | 0/0/567/0/0   | 0/0/17516/0/0 | -         |
|               | Copepoda     | Calanoida         | Acartiidae       | <i>Paracartia grani</i> Sars G.O., 1904           | 0/14/0/023/0  | 0/6/0/35/0    | -         |
|               |              |                   | Centropagidae    | <i>Centropages hamatus</i> (Lilljeborg, 1853)     | 0/66/0/4/0    | -             | -         |
|               |              |                   | Temoridae        | <i>Temora longicornis</i> (Müller O.F., 1785)     | -             | -             | -         |
|               |              | Cyclopoida        |                  | Cyclopoida ni                                     | -             | -             | -         |
|               |              | Poecilostomatoida | Mytilicolidae    | <i>Mytilicola orientalis</i> Mori, 1935           | -             | -             | -         |
|               | Malacostraca | Amphipoda         | Ampeliscidae     | <i>Ampelisca brevicornis</i> (Costa, 1853)        | -             | -             | -         |
|               |              |                   |                  | <i>Ampelisca sp.</i>                              | -             | -             | -         |
|               |              |                   | Corophiidae      | <i>Corophium sp.</i>                              | -             | -             | -         |
|               |              | Isopoda           | Anthuridae       | <i>Cyathura carinata</i> (Krøyer, 1847)           | 0/4/0/0/0     | -             | 1/0/0/2/0 |
|               |              |                   | Sphaeromatidae   | Sphaeromatidae ni                                 | -             | -             | -         |
|               |              | Decapoda          | Callinassidae    | <i>Pestarella tyrrhena</i> (Petagna, 1792)        | -             | -             | -         |
|               |              |                   | Diogenidae       | <i>Diogenes pugilator</i> (Roux, 1829)            | -             | -             | -         |
|               |              |                   | Inachidae        | <i>Macropodia rostrata</i> (Linnaeus, 1761)       | -             | -             | -         |
|               |              |                   |                  | <i>Macropodia sp.</i>                             | -             | -             | -         |
|               |              |                   | Paguridae        | <i>Pylopaguropsis magnimanus</i>                  | 0/4/0/0/0     | 0/0/45/0/0    | -         |
|               |              |                   | Pilumnidae       | <i>Pilumnus hirtellus</i> (Linnaeus, 1761)        | 0/0/0/4/0     | 0/0/8/4/0     | -         |
|               |              |                   |                  | <i>Pilumnus spinifer</i> H. Milne Edwards, 1834   | -             | 0/0/0/3/0     | -         |
|               |              |                   | Pinnotheridae    | <i>Pinnotheres pisum</i> (Linnaeus, 1767)         | -             | -             | -         |
|               |              |                   | Upogebiidae      | <i>Upogebia deltaura</i> (Leach, 1815)            | 0/0/0/4/0     | -             | -         |
| Bryozoa       | Gymnolaemata | Cheilostatida     | Bugulidae        | <i>Bugula neritina</i> (Linnaeus, 1758)           | -             | -             | -         |
| Echinodermata | Echinoidea   | Spatangoida       | Loveniidae       | <i>Echinocardium cordatum</i> (Pennant, 1777)     | -             | -             | -         |

|           |            |                 |                                         |                                            |                                                                               |                                             |                                               |                 |                |           |
|-----------|------------|-----------------|-----------------------------------------|--------------------------------------------|-------------------------------------------------------------------------------|---------------------------------------------|-----------------------------------------------|-----------------|----------------|-----------|
| Mollusca  | Bivalvia   | Anomalodesmata  | Thraciidae                              | <i>Thracia phaseolina</i> (Lamarck, 1818)  | -                                                                             | -                                           | -                                             |                 |                |           |
|           |            |                 | Myoida                                  | Corbulidae                                 | <i>Corbula gibba</i> (Olivi, 1792)                                            | -                                           | -                                             | 1/0/0/0/0       |                |           |
|           |            |                 | Veneroida                               | Cardiidae                                  | <i>Cerastoderma edule</i> (Linnaeus, 1758)                                    | 0/0/0/143/0                                 | 0/0/0/109/0                                   | -               |                |           |
|           |            |                 |                                         |                                            | <i>Parvicardium exiguum</i> (Gmelin, 1791)                                    | -                                           | -                                             | 0/0/1/0/0       |                |           |
|           |            |                 |                                         |                                            | <i>Parvicardium pinnulatum</i> (Conrad, 1831)                                 | -                                           | -                                             | 0/0/0/1/0       |                |           |
|           |            |                 |                                         |                                            | Donacidae                                                                     | <i>Donax trunculus</i> Linnaeus, 1758       | -                                             | -               | -              |           |
|           |            |                 |                                         |                                            | Mactridae                                                                     | <i>Spisula solida</i> (Linnaeus, 1758)      | -                                             | -               | -              |           |
|           |            |                 |                                         |                                            | Semelidae                                                                     | <i>Abra alba</i> (W. Wood, 1802)            | -                                             | -               | -              |           |
|           |            |                 |                                         |                                            | Ungulinidae                                                                   | <i>Diplodonta rotundata</i> (Montagu, 1803) | -                                             | -               | 0/0/0/1/0      |           |
|           |            |                 | Veneridae                               | <i>Chamelea striatula</i> (da Costa, 1778) | -                                                                             | -                                           | -                                             |                 |                |           |
|           |            |                 | [unassigned]                            | Solenidae                                  | <i>Solen marginatus</i> Pulteney, 1799                                        | 32/161/0/34/0                               | 4288/2081/0/49/0                              | 1/0/0/1/0       |                |           |
|           |            |                 | Euheterodonta                           | Gastropoda                                 | Littorinimorpha                                                               | Hydrobiidae                                 | <i>Ecrobia ventrosa</i> (Montagu, 1803)       | -               | -              | -         |
|           |            |                 |                                         |                                            | Neogastropoda                                                                 | Nassariidae                                 | <i>Nassarius reticulatus</i> (Linnaeus, 1758) | 7/82/6/110142/0 | 3/4/0/111689/9 | 1/0/1/0/0 |
| Nemertea  | Anopla     | Lineidae        | <i>Cerebratulus longiceps</i> Coe, 1901 | -                                          | -                                                                             | -                                           |                                               |                 |                |           |
|           |            |                 | <i>Cerebratulus sp.</i>                 | -                                          | -                                                                             | -                                           |                                               |                 |                |           |
| Plantae   | Rhodophyta | Bangiophyceae   | Bangiales                               | Bangiaceae                                 | <i>Pyropia haitanensis</i> (T.J.Chang & B.F.Zheng) N.Kikuchi & M.Miyata, 2011 | 0/0/59/0/0                                  | -                                             | -               |                |           |
|           |            | Florideophyceae | Ceramiales                              | Ceramiaceae                                | <i>Ceramium secundatum</i> Lyngbye, 1819                                      | -                                           | -                                             | -               |                |           |
| Chromista | Ochrophyta | Phaeophyceae    | Fucales                                 | Durvillaeaceae                             | <i>Durvillaea sp.</i>                                                         | -                                           | 0/0/8/0/0                                     | -               |                |           |
|           |            |                 | Ectocarpales                            | Chordariaceae                              | <i>Leathesia marina</i> (Lyngbye) Decaisne, 1842                              | -                                           | -                                             | -               |                |           |
|           |            |                 | Scytosiphonales                         | Scytosiphonaceae                           | <i>Petalonia fascia</i> (O.F.Müller) Kuntze, 1898                             | -                                           | -                                             | -               |                |           |
|           |            |                 |                                         |                                            | <i>Scytosiphon lomentaria</i> (Lyngbye) Link, 1833                            | -                                           | -                                             | -               |                |           |

|          |          |            |       |              |                                                  | NMC3                          |                          |           |
|----------|----------|------------|-------|--------------|--------------------------------------------------|-------------------------------|--------------------------|-----------|
| Kingdom  | Phylum   | Class      | Order | Family       | Species                                          | HTS B                         | HTS D                    | Morph.    |
| Animalia | Annelida | Polychaeta |       | Capitellidae | <i>Notomastus profundus</i> (Eisig, 1887)        | -                             | 0/18/40/0/330            | 0/3/1/2/0 |
|          |          |            |       | Maldanidae   | <i>Axiothella constricta</i> (Claparède, 1869)   | 0/0/6605/3/0                  | 0/4/7167/0/0             | 0/1/0/0/0 |
|          |          |            |       |              | <i>Euclymene santandarensis</i> (Rioja, 1917)    | 0/28132/18991/21806/24830     | 0/1818/6506/290/9276     | 0/1/0/0/0 |
|          |          |            |       |              | <i>Euclymene sp.</i>                             | 32146/6/0/8/40                | 3690/4/5/0/0             | -         |
|          |          |            |       |              | <i>Heteroclymene robusta</i> Arwidsson, 1906     | 0/0/80/100/110                | 0/1816/6506/290/9276     | 0/1/0/0/0 |
|          |          |            |       |              | <i>Leiochone leiopygos</i> (Grube, 1860)         | 0/46973/22387/2356/8859       | 0/11373/8075/89/2713     | -         |
|          |          |            |       |              | <i>Leiochone sp.</i>                             | 4368/4390/1422/4137/27        | 7139/4232/3710/667/3     | -         |
|          |          |            |       |              | <i>Praxillella praetermissa</i> (Malmgren, 1865) | 100674/73141/6996/97097/54348 | 6795/2639/755/2349/15131 | 1/1/0/0/0 |
|          |          |            |       |              | Orbiniidae                                       | Orbiniidae ni                 | -                        | -         |



|            |              |                   |                                            |                                                             |                                                   |                            |                             |   |
|------------|--------------|-------------------|--------------------------------------------|-------------------------------------------------------------|---------------------------------------------------|----------------------------|-----------------------------|---|
| Arthropoda | Clitellata   | Eunicida          | Eunicidae                                  | <i>Marphysa sanguinea</i> (Montagu, 1815)                   | 8/10/64700/0/0                                    | 0/40/60236/0/0             | -                           |   |
|            |              |                   |                                            | <i>Marphysa sp.</i>                                         | 0/0/4/0/0                                         | 0/0/155/0/0                | -                           |   |
|            |              |                   | Onuphidae                                  | <i>Diopatra aciculata</i> Knox & Cameron, 1971              | -                                                 | -                          | -                           |   |
|            |              |                   |                                            | <i>Diopatra marocensis</i> Paxton, Fadlaoui & Lechapt, 1995 | 56908/0/7/9/0                                     | 1517/4/0/0/0               | -                           |   |
|            |              |                   |                                            | <i>Diopatra neapolitana</i> Delle Chiaje, 1841              | 0/97/0/0/9                                        | 0/15/0/0/0                 | -                           |   |
|            |              |                   | Phyllodocida                               | Glyceridae                                                  | <i>Glycera alba</i> (O.F. Müller, 1776)           | 1133/25/96483/27310/10968  | 1026/152/131646/20396/21114 | - |
|            |              |                   |                                            |                                                             | <i>Glycera sp.</i>                                | 1194/32/103155/28837/11832 | 1026/152/131585/20389/21105 | - |
|            |              |                   |                                            |                                                             | <i>Glycera tridactyla</i> Schmarda, 1861          | -                          | 0/0/88/9/19                 | - |
|            |              |                   |                                            | Nephtyidae                                                  | <i>Nephtys cirrosa</i> Ehlers, 1868               | 0/0/0/0/16                 | -                           | - |
|            |              |                   |                                            |                                                             | <i>Nephtys hombergii</i> Savigny in Lamarck, 1818 | 0/0/13/0/30                | 0/0/3/0/24                  | - |
|            |              |                   | Nereididae                                 | <i>Hediste diversicolor</i> (O.F. Müller, 1776)             | -                                                 | -                          | -                           |   |
|            |              |                   | Phyllodoceidae                             | <i>Phyllodoce groenlandica</i> Örsted, 1842                 | -                                                 | -                          | -                           |   |
|            |              |                   | Polynoidae                                 | <i>Paralepidonotus ampulliferus</i> (Grube, 1878)           | -                                                 | -                          | -                           |   |
|            |              | Sabellida         | Oweniidae                                  | <i>Owenia fusiformis</i> Delle Chiaje, 1844                 | -                                                 | -                          | -                           |   |
|            |              | Terebellida       | Cirratulidae                               | Cirratulidae ni                                             | -                                                 | -                          | -                           |   |
|            |              |                   | Pectinariidae                              | <i>Lagis koreni</i> Malmgren, 1866                          | -                                                 | -                          | -                           |   |
|            |              |                   | Terebellidae                               | <i>Pista cristata</i> (Müller, 1776)                        | 19917/0/187/12/69                                 | 34751/93/211/8/4           | -                           |   |
|            |              |                   | Trichobranchinae                           | <i>Trichobranchus glacialis</i> Malmgren, 1866              | 0/0/0/0/8                                         | 0/17/0/0/4                 | -                           |   |
|            |              | Haplotaxida       | Tubificidae                                | <i>Chaetogaster diaphanus</i> (Gruithuisen, 1828)           | -                                                 | -                          | -                           |   |
|            |              |                   |                                            | <i>Nais communis</i> Pignet, 1906                           | -                                                 | -                          | -                           |   |
|            |              |                   |                                            | <i>Stylaria lacustris</i> (Linnaeus, 1767)                  | -                                                 | -                          | -                           |   |
|            |              | Lumbriculida      | Lumbriculidae                              | <i>Lumbriculus variegatus</i> (Müller, 1774)                | -                                                 | -                          | -                           |   |
|            |              | Cirripedia        | Sessilia                                   | Balanidae                                                   | <i>Amphibalanus amphitrite</i> (Darwin, 1854)     | -                          | 4/0/0/0/0                   | - |
|            | Copepoda     | Calanoida         | Acartiidae                                 | <i>Paracartia grani</i> Sars G.O., 1904                     | -                                                 | -                          | -                           |   |
|            |              |                   | Centropagidae                              | <i>Centropages hamatus</i> (Lilljeborg, 1853)               | -                                                 | -                          | -                           |   |
|            |              |                   | Temoridae                                  | <i>Temora longicornis</i> (Müller O.F., 1785)               | -                                                 | -                          | -                           |   |
|            |              | Cyclopoida        | Cyclopoida ni                              | -                                                           | 3/0/0/0/0                                         | -                          |                             |   |
|            |              | Poecilostomatoida | Mytilicolidae                              | <i>Mytilicola orientalis</i> Mori, 1935                     | -                                                 | -                          | -                           |   |
|            | Malacostraca | Amphipoda         | Ampeliscidae                               | <i>Ampelisca brevicornis</i> (Costa, 1853)                  | -                                                 | 0/0/14/0/0                 | 1/0/0/0/1                   |   |
|            |              |                   |                                            | <i>Ampelisca sp.</i>                                        | 0/372/115/629/0                                   | 0/12/307/7/0               | -                           |   |
|            |              |                   | Corophiidae                                | <i>Corophium sp.</i>                                        | 0/0/183/16/173                                    | 0/0/80/4/34                | -                           |   |
|            | Isopoda      | Anthuridae        | <i>Cyathura carinata</i> (Krøyer, 1847)    | -                                                           | -                                                 | 0/0/0/1/0                  |                             |   |
|            |              | Sphaeromatidae    | Sphaeromatidae ni                          | -                                                           | -                                                 | -                          |                             |   |
|            | Decapoda     | Callianassidae    | <i>Pestarella tyrrhena</i> (Petagna, 1792) | -                                                           | 0/3/0/0/0                                         | -                          |                             |   |

|               |              |                 |                 |                  |                                                                               |               |                |           |
|---------------|--------------|-----------------|-----------------|------------------|-------------------------------------------------------------------------------|---------------|----------------|-----------|
|               |              |                 |                 | Diogenidae       | <i>Diogenes pugilator</i> (Roux, 1829)                                        | 0/0/0/1194/0  | 0/0/0/89/0     | -         |
|               |              |                 |                 | Inachidae        | <i>Macropodia rostrata</i> (Linnaeus, 1761)                                   | 13/0/0/0/0    | -              | -         |
|               |              |                 |                 |                  | <i>Macropodia sp.</i>                                                         | 838/0/13/0/0  | 24/0/6/0/0     | -         |
|               |              |                 |                 | Paguridae        | <i>Pylopaguropsis magnimanus</i>                                              | 0/0/0/23406/0 | 0/16/0/26927/0 | -         |
|               |              |                 |                 | Pilumnidae       | <i>Pilumnus hirtellus</i> (Linnaeus, 1761)                                    | -             | -              | -         |
|               |              |                 |                 |                  | <i>Pilumnus spinifer</i> H. Milne Edwards, 1834                               | -             | -              | -         |
|               |              |                 |                 | Pinnotheridae    | <i>Pinnotheres pisum</i> (Linnaeus, 1767)                                     | 0/0/0/0/23    | 0/0/0/0/3      | -         |
|               |              |                 |                 | Upogebiidae      | <i>Upogebia deltaura</i> (Leach, 1815)                                        | -             | -              | -         |
| Bryozoa       | Gymnolaemata | Cheilostomatida |                 | Bugulidae        | <i>Bugula neritina</i> (Linnaeus, 1758)                                       | -             | -              | -         |
| Echinodermata | Echinoidea   | Spatangoida     |                 | Loveniidae       | <i>Echinocardium cordatum</i> (Pennant, 1777)                                 | 0/0/0/35176/5 | -              | -         |
| Mollusca      | Bivalvia     | Anomalodesmata  |                 | Thraciidae       | <i>Thracia phaseolina</i> (Lamarck, 1818)                                     | 6/0/0/0/0     | 17/0/0/0/0     | -         |
|               |              | Myoida          |                 | Corbulidae       | <i>Corbula gibba</i> (Olivi, 1792)                                            | -             | -              | -         |
|               |              | Veneroida       |                 | Cardiidae        | <i>Cerastoderma edule</i> (Linnaeus, 1758)                                    | -             | -              | -         |
|               |              |                 |                 |                  | <i>Parvicardium exiguum</i> (Gmelin, 1791)                                    | -             | -              | -         |
|               |              |                 |                 |                  | <i>Parvicardium pinnulatum</i> (Conrad, 1831)                                 | -             | -              | -         |
|               |              |                 |                 | Donacidae        | <i>Donax trunculus</i> Linnaeus, 1758                                         | -             | -              | 2/0/0/0/0 |
|               |              |                 |                 | Mactridae        | <i>Spisula solida</i> (Linnaeus, 1758)                                        | -             | -              | -         |
|               |              |                 |                 | Semelidae        | <i>Abra alba</i> (W. Wood, 1802)                                              | -             | -              | 0/0/0/0/1 |
|               |              |                 |                 | Ungulinidae      | <i>Diplodonta rotundata</i> (Montagu, 1803)                                   | -             | -              | -         |
|               |              |                 |                 | Veneridae        | <i>Chamelea striatula</i> (da Costa, 1778)                                    | 8/0/0/0/0     | 112/0/0/0/0    | -         |
|               |              | [unassigned]    |                 |                  |                                                                               |               |                |           |
|               |              | Euheterodonta   |                 | Solenidae        | <i>Solen marginatus</i> Pulteney, 1799                                        | -             | -              | -         |
|               |              | Gastropoda      |                 | Hydrobiidae      | <i>Ecrobia ventrosa</i> (Montagu, 1803)                                       | -             | -              | -         |
|               |              | Littorinimorpha |                 | Nassariidae      | <i>Nassarius reticulatus</i> (Linnaeus, 1758)                                 | 0/12/0/3/0    | 4/3/0/5/0      | -         |
|               |              | Neogastropoda   |                 | Lineidae         | <i>Cerebratulus longiceps</i> Coe, 1901                                       | -             | -              | -         |
| Nemertea      | Anopla       |                 |                 |                  | <i>Cerebratulus sp.</i>                                                       | 11/0/0/53/0   | 4/0/0/0/0      | -         |
|               |              |                 |                 |                  | <i>Pyropia haitanensis</i> (T.J.Chang & B.F.Zheng) N.Kikuchi & M.Miyata, 2011 | -             | -              | -         |
| Plantae       | Rhodophyta   | Bangiophyceae   | Bangiales       | Bangiaceae       |                                                                               | -             | -              | -         |
|               |              | Florideophyceae | Ceramiales      | Ceramiaceae      | <i>Ceramium secundatum</i> Lyngbye, 1819                                      | -             | -              | -         |
| Chromista     | Ochrophyta   | Phaeophyceae    | Fucales         | Durvillaeaceae   | <i>Durvillaea sp.</i>                                                         | -             | -              | -         |
|               |              |                 | Ectocarpales    | Chordariaceae    | <i>Leathesia marina</i> (Lyngbye) Decaisne, 1842                              | -             | 0/0/0/13/0     | -         |
|               |              |                 | Scytosiphonales | Scytosiphonaceae | <i>Petalonia fascia</i> (O.F.Müller) Kuntze, 1898                             | 0/0/0/44/0    | 0/0/0/7/0      | -         |
|               |              |                 |                 |                  | <i>Scytosiphon lomentaria</i> (Lyngbye) Link, 1833                            | 0/0/0/8/0     | 0/0/0/4/0      | -         |

---



---

**NMC4**

---

| Kingdom  | Phylum   | Class      | Order      | Family       | Species                                          | HTS B                                                       | HTS D                                             | Morph.                                            |                           |            |   |
|----------|----------|------------|------------|--------------|--------------------------------------------------|-------------------------------------------------------------|---------------------------------------------------|---------------------------------------------------|---------------------------|------------|---|
| Animalia | Annelida | Polychaeta |            | Capitellidae | <i>Notomastus profundus</i> (Eisig, 1887)        | -                                                           | 0/0/0/39                                          | 2/2/1/1/2                                         |                           |            |   |
|          |          |            |            | Maldanidae   | <i>Axiothella constricta</i> (Claparède, 1869)   | -                                                           | -                                                 | 0/1/0/0/2                                         |                           |            |   |
|          |          |            |            |              | <i>Euclymene santandarensis</i> (Rioja, 1917)    | 6/0/14/0/94                                                 | 0/4/0/0/0                                         | -                                                 |                           |            |   |
|          |          |            |            |              | <i>Euclymene sp.</i>                             | 81884/0/3/4/17379                                           | 4141/0/0/0400                                     | -                                                 |                           |            |   |
|          |          |            |            |              | <i>Heteroclymene robusta</i> Arwidsson, 1906     | 0/8/54/5/0                                                  | -                                                 | -                                                 |                           |            |   |
|          |          |            |            |              | <i>Leiochone leiopygos</i> (Grube, 1860)         | 66883/0/3682/0/5683                                         | 23424/4/93/13/47                                  | -                                                 |                           |            |   |
|          |          |            |            |              | <i>Leiochone sp.</i>                             | 5481/8529/19580/0/5                                         | 6578/7055/9972/9/0                                | -                                                 |                           |            |   |
|          |          |            |            |              | <i>Praxillella praetermissa</i> (Malmgren, 1865) | 17/10096/9/214979/143                                       | 16/84/3/33374/0                                   | -                                                 |                           |            |   |
|          |          |            |            |              | Orbiniidae                                       | Orbiniidae ni                                               | 0/0/0/0/110                                       | -                                                 | -                         |            |   |
|          |          |            |            |              | Eunicida                                         | Eunicidae                                                   | <i>Marphysa sanguinea</i> (Montagu, 1815)         | 14/0/0/0/0                                        | 0/3/0/0/0                 | -          |   |
|          |          |            |            |              |                                                  |                                                             | <i>Marphysa sp.</i>                               | -                                                 | -                         | -          |   |
|          |          |            |            |              |                                                  | Onuphidae                                                   | <i>Diopatra aciculata</i> Knox & Cameron, 1971    | -                                                 | -                         | -          |   |
|          |          |            |            |              |                                                  | <i>Diopatra marocensis</i> Paxton, Fadlaoui & Lechapt, 1995 | 0/0/0/7/0                                         | 0/0/0/4/0                                         | -                         |            |   |
|          |          |            |            |              |                                                  | <i>Diopatra neapolitana</i> Delle Chiaje, 1841              | 3/0/0/0/100                                       | 0/36/0/0/0                                        | -                         |            |   |
|          |          |            |            |              | Phyllodocida                                     | Glyceridae                                                  | <i>Glycera alba</i> (O.F. Müller, 1776)           | 2824/26489/96088/5/18                             | 3083/37774/68109/6/0      | -          |   |
|          |          |            |            |              |                                                  |                                                             | <i>Glycera sp.</i>                                | 3017/27374101978/7/21                             | 3083/37768/68083/6/0      | -          |   |
|          |          |            |            |              |                                                  |                                                             | <i>Glycera tridactyla</i> Schmarda, 1861          | -                                                 | 0/15/44/0/0               | -          |   |
|          |          |            |            |              |                                                  | Nephtyidae                                                  | <i>Nephtys cirrosa</i> Ehlers, 1868               | -                                                 | -                         | -          |   |
|          |          |            |            |              |                                                  |                                                             | <i>Nephtys hombergii</i> Savigny in Lamarck, 1818 | 6/0/43/3/7                                        | 0/0/5/0/0                 | -          |   |
|          |          |            |            |              |                                                  | Nereididae                                                  | <i>Hediste diversicolor</i> (O.F. Müller, 1776)   | -                                                 | -                         | -          |   |
|          |          |            |            |              |                                                  | Phyllodoceidae                                              | <i>Phyllodoce groenlandica</i> Örsted, 1842       | -                                                 | -                         | -          |   |
|          |          |            |            |              |                                                  | Polynoidae                                                  | <i>Paralepidonotus ampulliferus</i> (Grube, 1878) | -                                                 | -                         | -          |   |
|          |          |            |            |              | Sabellida                                        | Oweniidae                                                   | <i>Owenia fusiformis</i> Delle Chiaje, 1844       | -                                                 | -                         | -          |   |
|          |          |            |            |              | Terebellida                                      | Cirratulidae                                                | Cirratulidae ni                                   | -                                                 | -                         | -          |   |
|          |          |            |            |              |                                                  | Pectinariidae                                               | <i>Lagis koreni</i> Malmgren, 1866                | 219/0/0/0/0                                       | 984/0/0/0/0               | -          |   |
|          |          |            |            |              |                                                  | Terebellidae                                                | <i>Pista cristata</i> (Müller, 1776)              | 15462/97719/14039/7208/37                         | 29861/88881/11545/12673/3 | 0/1/0/1/0  |   |
|          |          |            |            |              |                                                  | Trichobranchinae                                            | <i>Trichobranthus glacialis</i> Malmgren, 1866    | 3038/0/0/3/0                                      | 17917/0/6/3/0             | -          |   |
|          |          |            |            |              | Clitellata                                       | Haplotaxida                                                 | Tubificidae                                       | <i>Chaetogaster diaphanus</i> (Gruithuisen, 1828) | -                         | -          | - |
|          |          |            |            |              |                                                  |                                                             |                                                   | <i>Nais communis</i> Piguët, 1906                 | -                         | -          | - |
|          |          |            |            |              |                                                  |                                                             |                                                   | <i>Stylaria lacustris</i> (Linnaeus, 1767)        | 0/0/6/0/4                 | 0/4/0/0/44 | - |
|          |          |            |            |              |                                                  | Lumbriculida                                                | Lumbriculidae                                     | <i>Lumbriculus variegatus</i> (Müller, 1774)      | 9/0/0/0/0                 | -          | - |
|          |          |            |            | Arthropoda   | Cirripedia                                       | Sessilia                                                    | Balanidae                                         | <i>Amphibalanus amphitrite</i> (Darwin, 1854)     | -                         | -          | - |
|          | Copepoda | Calanoida  | Acartiidae |              | <i>Paracartia grani</i> Sars G.O., 1904          | -                                                           | -                                                 | -                                                 |                           |            |   |

|               |              |                   |                |                                                 |                     |                |           |
|---------------|--------------|-------------------|----------------|-------------------------------------------------|---------------------|----------------|-----------|
|               |              |                   | Centropagidae  | <i>Centropages hamatus</i> (Lilljeborg, 1853)   | -                   | -              | -         |
|               |              |                   | Temoridae      | <i>Temora longicornis</i> (Müller O.F., 1785)   | 0/0/0/10/0          | 0/0/0/25/0     | -         |
|               |              | Cyclopoida        |                | Cyclopoida ni                                   | -                   | -              | -         |
|               |              | Poecilostomatoida | Mytilicolidae  | <i>Mytilicola orientalis</i> Mori, 1935         | -                   | 0/0/39/0/0     | -         |
|               | Malacostraca | Amphipoda         | Ampeliscidae   | <i>Ampelisca brevicornis</i> (Costa, 1853)      | -                   | 0/0/0/20/0     | -         |
|               |              |                   |                | <i>Ampelisca sp.</i>                            | 0/0/0/1693/0        | 0/0/0/720/0    | -         |
|               |              |                   | Corophiidae    | <i>Corophium sp.</i>                            | 0/8/0/0/0           | -              | -         |
|               |              | Isopoda           | Anthuridae     | <i>Cyathura carinata</i> (Krøyer, 1847)         | -                   | -              | 1/0/1/0/1 |
|               |              |                   | Sphaeromatidae | Sphaeromatidae ni                               | 0/0/0/0/548         |                |           |
|               |              | Decapoda          | Callianassidae | <i>Pestarella tyrrhena</i> (Petagna, 1792)      | 2206/0/0/0/0        | 1152/0/0/0/0   | -         |
|               |              |                   | Diogenidae     | <i>Diogenes pugilator</i> (Roux, 1829)          | -                   | -              | -         |
|               |              |                   | Inachidae      | <i>Macropodia rostrata</i> (Linnaeus, 1761)     | -                   | -              | -         |
|               |              |                   |                | <i>Macropodia sp.</i>                           | -                   | -              | -         |
|               |              |                   | Paguridae      | <i>Pylopaguropsis magnimanus</i>                | -                   | -              | -         |
|               |              |                   | Pilumnidae     | <i>Pilumnus hirtellus</i> (Linnaeus, 1761)      | 0/0/6/14/0          | -              | -         |
|               |              |                   |                | <i>Pilumnus spinifer</i> H. Milne Edwards, 1834 | -                   | -              | -         |
|               |              |                   | Pinnotheridae  | <i>Pinnotheres pisum</i> (Linnaeus, 1767)       | 0/15402/12676/0/845 | 0/716/479/0/16 | 0/0/0/1/0 |
|               |              |                   | Upogebiidae    | <i>Upogebia deltaura</i> (Leach, 1815)          | -                   | -              | -         |
| Bryozoa       | Gymnolaemata | Cheilostomatida   | Bugulidae      | <i>Bugula neritina</i> (Linnaeus, 1758)         | 0/0/51/0/0          | 0/0/0/12/0     | -         |
| Echinodermata | Echinoidea   | Spatangoida       | Loveniidae     | <i>Echinocardium cordatum</i> (Pennant, 1777)   | 4/0/0/0/0           | -              | 0/0/0/0/1 |
| Mollusca      | Bivalvia     | Anomalodesmata    | Thraciidae     | <i>Thracia phaseolina</i> (Lamarck, 1818)       | 0/0/0/0/117         | 0/0/0/0/135    | -         |
|               |              | Myoida            | Corbulidae     | <i>Corbula gibba</i> (Olivi, 1792)              | -                   | -              | 0/1/0/1/0 |
|               |              | Veneroida         | Cardiidae      | <i>Cerastoderma edule</i> (Linnaeus, 1758)      | 0/0/22/0/21         | 0/5/129/0/105  | 0/2/1/1/1 |
|               |              |                   |                | <i>Parvicardium exiguum</i> (Gmelin, 1791)      | -                   | -              | -         |
|               |              |                   |                | <i>Parvicardium pinnulatum</i> (Conrad, 1831)   | -                   | -              | -         |
|               |              |                   | Donacidae      | <i>Donax trunculus</i> Linnaeus, 1758           | -                   | -              | -         |
|               |              |                   | Mactridae      | <i>Spisula solida</i> (Linnaeus, 1758)          | -                   | -              | 0/0/0/0/1 |
|               |              |                   | Semelidae      | <i>Abra alba</i> (W. Wood, 1802)                | -                   | -              | 0/0/0/1/0 |
|               |              |                   | Ungulinidae    | <i>Diplodonta rotundata</i> (Montagu, 1803)     | -                   | -              | -         |
|               |              |                   | Veneridae      | <i>Chamelea striatula</i> (da Costa, 1778)      | -                   | -              | -         |
|               |              | [unassigned]      |                |                                                 |                     |                |           |
|               |              | Euheterodonta     | Solenidae      | <i>Solen marginatus</i> Pulteney, 1799          | -                   | -              | 0/0/1/1/0 |
|               | Gastropoda   | Littorinimorpha   | Hydrobiidae    | <i>Ecrobia ventrosa</i> (Montagu, 1803)         | -                   | -              | -         |
|               |              | Neogastropoda     | Nassariidae    | <i>Nassarius reticulatus</i> (Linnaeus, 1758)   | 0/4/0/0/12          | 0/16/0/0/0     | -         |
| Nemertea      | Anopla       |                   | Lineidae       | <i>Cerebratulus longiceps</i> Coe, 1901         | -                   | 0/0/0/4/0      | -         |

|           |            |                 |                 |                  |                                                                               |             |             |   |
|-----------|------------|-----------------|-----------------|------------------|-------------------------------------------------------------------------------|-------------|-------------|---|
|           |            |                 |                 |                  | <i>Cerebratulus sp.</i>                                                       | -           | -           | - |
| Plantae   | Rhodophyta | Bangiophyceae   | Bangiales       | Bangiaceae       | <i>Pyropia haitanensis</i> (T.J.Chang & B.F.Zheng) N.Kikuchi & M.Miyata, 2011 | 0/0/0/3/0   | -           | - |
|           |            | Florideophyceae | Ceramiales      | Ceramiaceae      | <i>Ceramium secundatum</i> Lyngbye, 1819                                      | 0/0/104/0/0 | 0/0/0/272/0 | - |
| Chromista | Ochrophyta | Phaeophyceae    | Fucales         | Durvillaeaceae   | <i>Durvillaea sp.</i>                                                         | -           | -           | - |
|           |            |                 | Ectocarpales    | Chordariaceae    | <i>Leathesia marina</i> (Lyngbye) Decaisne, 1842                              | -           | -           | - |
|           |            |                 | Scytosiphonales | Scytosiphonaceae | <i>Petalonia fascia</i> (O.F.Müller) Kuntze, 1898                             | -           | -           | - |
|           |            |                 |                 |                  | <i>Scytosiphon lomentaria</i> (Lyngbye) Link, 1833                            | -           | -           | - |

---
